# Supplementary material
Source: HighWire-hosted journal article supplement (https://erj.ersjournals.com/content/56/4/2001811)
Supplement: inline-supplementary-material-1 [file inline-supplementary-material-1.pdf]

## **Supplementary material**

**Elevated D-dimers and lack of anticoagulation predict PE in severe  
COVID-19 patients**

**Supplementary Table S1:** Univariable predictors of in-hospital CTPA-confirmed pulmonary embolism in severe COVID 19 patients, using the Firth's Penalized Likelihood estimator

| Variable                                                 | Univariate analysis |         |
|----------------------------------------------------------|---------------------|---------|
|                                                          | OR (95% CI)         | p-value |
| Male sex                                                 | 2.7 (1.1-6.1)       | 0.02    |
| Extension CTPA findings                                  | 1.51(1.1-2.1)       | 0.03    |
| White blood cell count (per quartile)                    | 1.6 (1.1-2.1)       | 0.005   |
| Blood urea (per quartile)                                | 1.7 (1.2-2.4)       | 0.001   |
| Gamma-GT (per quartile)                                  | 1.7 (1.2-2.3)       | <0.001  |
| Alkaline phosphatase (per quartile)                      | 1.5 (1.1-2.1)       | 0.005   |
| PaCO <sub>2</sub> (per quartile)                         | 1.8 (1.3-2.5)       | <0.001  |
| HCO <sub>3</sub> <sup>-</sup> (per quartile)             | 1.7 (1.2-2.4)       | 0.001   |
| No anticoagulant therapy                                 | 2.3 (0.9-5.9)       | 0.08    |
| Conventional wards vs ICU                                | 3.8 (1.8-7.9)       | <0.001  |
| D-dimer (per quartile)                                   | 4.7 (2.9-7.5)       | <0.001  |
| <b>Model with D-dimer cut-off derived from ROC curve</b> |                     |         |
| D-dimer > 2590 ng/mL                                     | 29.2 (11.6-73.2)    | <0.001  |

CTPA: computed tomography pulmonary angiogram; Gamma-GT: Gamma-glutamyltranspeptidase; HCO<sub>3</sub><sup>-</sup>: bicarbonates; LMWH: low molecular weight heparin; ICU: intensive care unit.

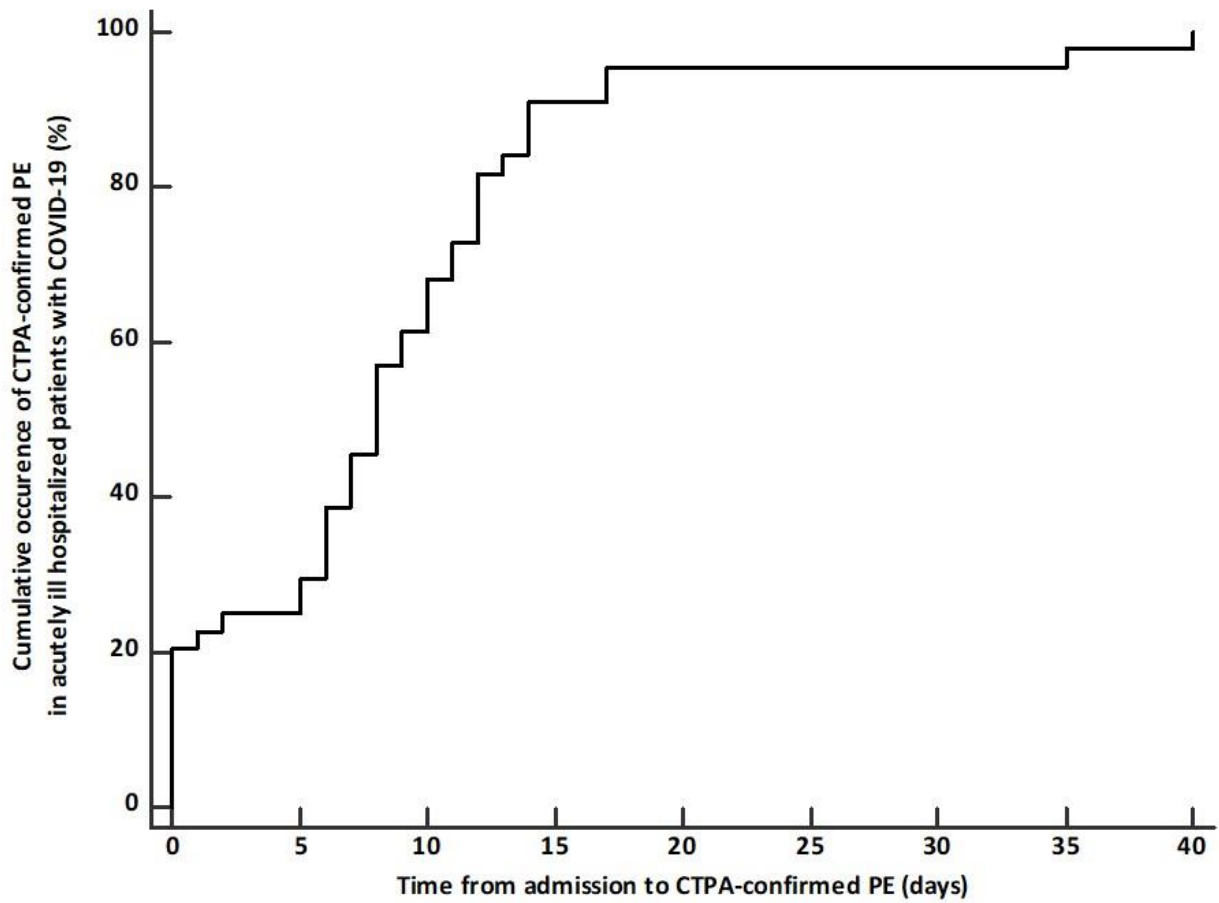

Figure S1: Cumulative occurrence of CTAP-confirmed pulmonary embolism between admission and CTPA in acutely ill hospitalized COVID-19 patients

COVID-19: coronavirus disease 2019; CTPA: computed tomography pulmonary angiography;

PE: pulmonary embolism

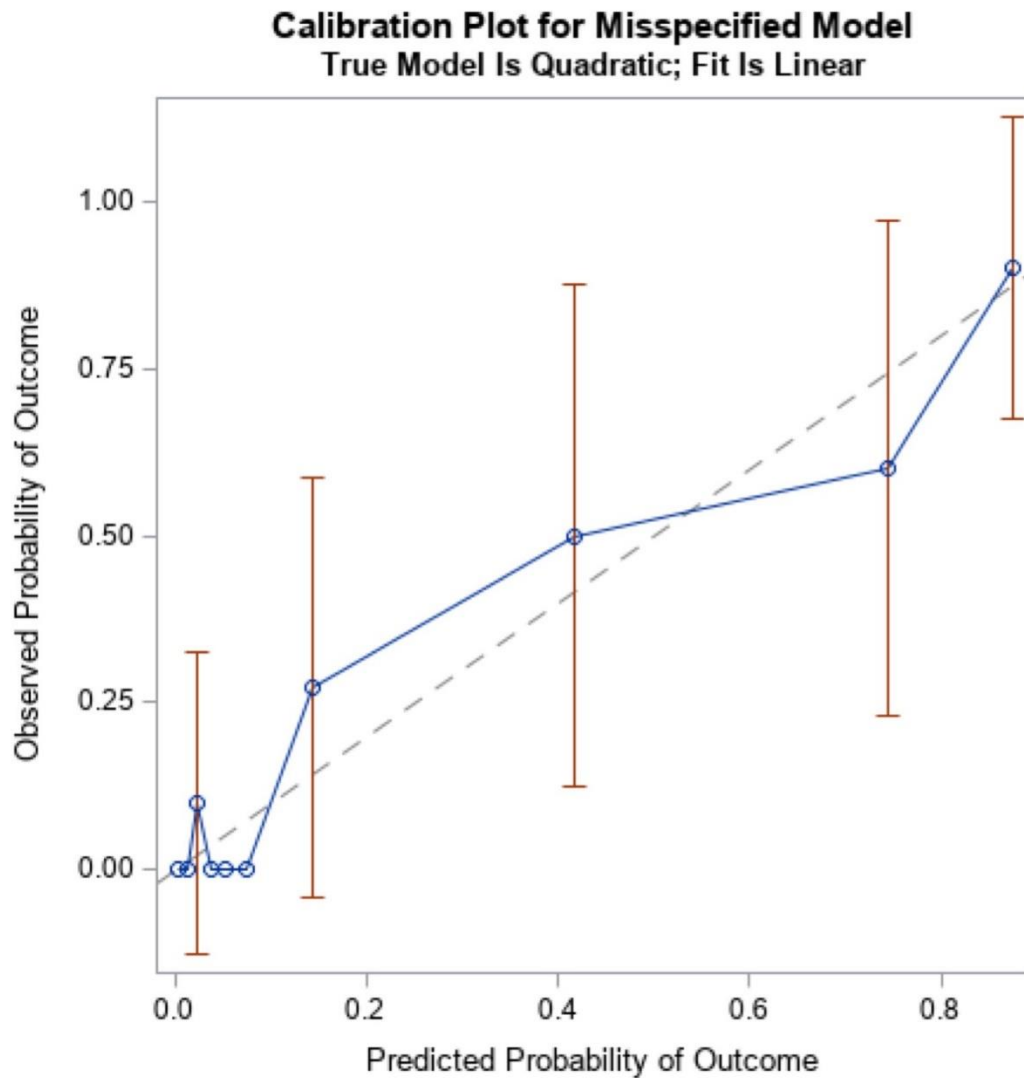

Figure S2: Decile calibration plots of the model predicting CTPA confirmed pulmonary embolism in severe Covid-19 patients. Model including D-dimer per quartile was well calibrated with the predicted risks and their confidence intervals distributed around the observed risk of pulmonary embolism. CTPA: computed tomography pulmonary angiography.

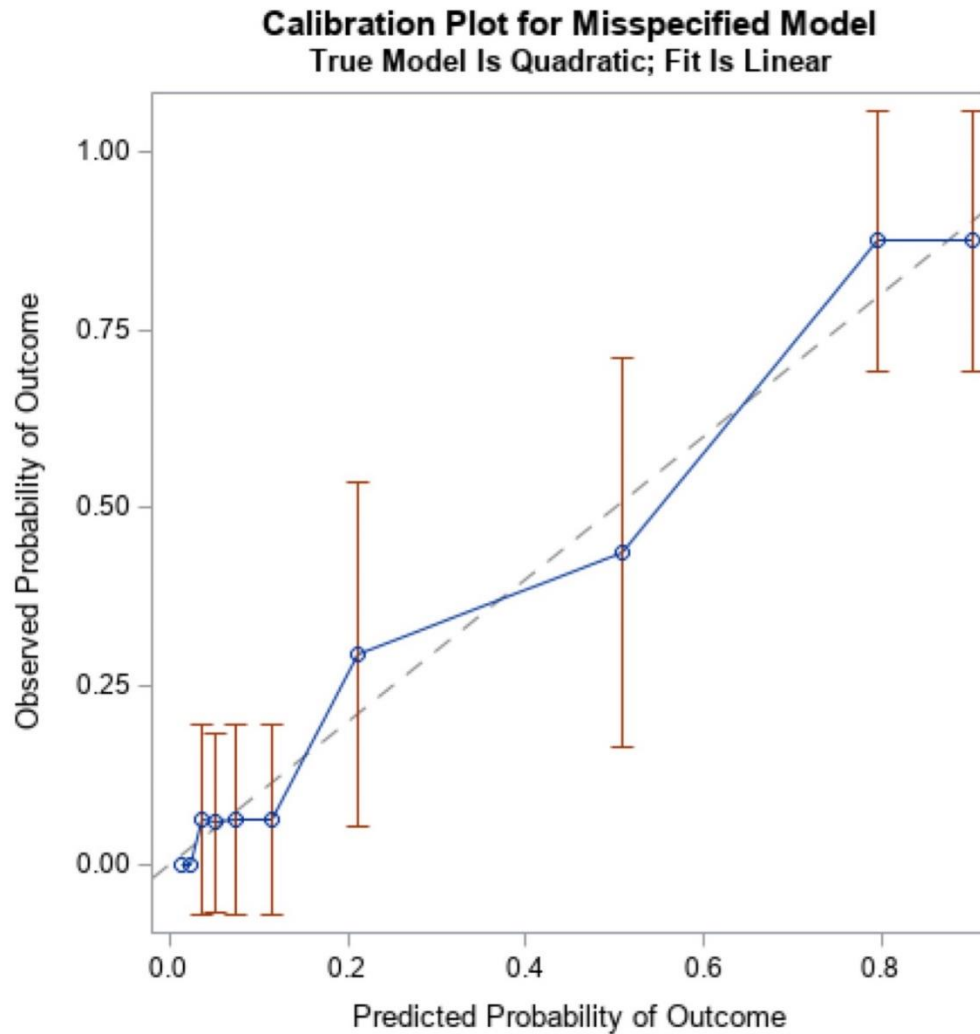

Figure S3: Decile calibration plots of the model predicting CTPA confirmed pulmonary embolism in severe Covid-19 patients. Model including the optimal ROC curve-derived cut-off value of D-dimer level (i.e. 2590 ng/mL) was well calibrated with the predicted risks and their confidence intervals distributed around the observed risk of pulmonary embolism. CTPA: computed tomography pulmonary angiography
