# Supplementary material
Source: HighWire-hosted journal article supplement (https://erj.ersjournals.com/content/56/4/2001811)
Supplement: inline-supplementary-material-2 [file inline-supplementary-material-2.pdf]

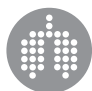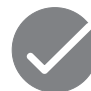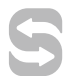

SHAREABLE PDF

# Elevated D-dimers and lack of anticoagulation predict PE in severe COVID-19 patients

Basile Mouhat <sup>1</sup>, Matthieu Besutti<sup>1</sup>, Kevin Bouiller<sup>2,3</sup>, Franck Grillet <sup>4</sup>, Charles Monnin<sup>1</sup>, Fiona Ecartot<sup>1,5</sup>, Julien Behr<sup>4</sup>, Gilles Capellier<sup>5,6</sup>, Thibaud Soumagne<sup>6</sup>, Sébastien Pili-Floury<sup>5,7</sup>, Guillaume Besch<sup>5,7</sup>, Guillaume Mourey<sup>8,9</sup>, Quentin Lepiller<sup>10</sup>, Catherine Chirouze <sup>2,3</sup>, François Schiele <sup>1,5</sup>, Romain Chopard<sup>1,5,11</sup> and Nicolas Meneveau<sup>1,5,11</sup>

**Affiliations:** <sup>1</sup>Dept of Cardiology, University Hospital, Besançon, France. <sup>2</sup>Infectious and Tropical Diseases Unit, University Hospital, Besançon, France. <sup>3</sup>UMR CNRS 6249 Chrono-Environnement, University of Franche-Comte, Besançon, France. <sup>4</sup>Dept of Radiology, Besançon University Hospital, Besançon, France. <sup>5</sup>Research Unit EA3920, University of Franche-Comte, Besançon, France. <sup>6</sup>Medical Intensive Care Unit, University Hospital, Besançon, France. <sup>7</sup>Anesthesia and Surgical Intensive Care Unit, University Hospital, Besançon, France. <sup>8</sup>Hematology Unit, University Hospital, Besançon, France. <sup>9</sup>INSERM UMR 1098, University of Franche-Comte, Besançon, France. <sup>10</sup>Virology Laboratory, University Hospital, Besançon, France. <sup>11</sup>Both authors contributed equally.

**Correspondence:** Nicolas Meneveau, Dept of Cardiology, University Hospital Jean Minjot, 3 Boulevard Fleming, 25000 Besançon, France. E-mail: nicolas.meneveau@univ-fcomte.fr

@ERSpublications

We studied predictors of pulmonary embolism in severe COVID-19 and found that D-dimer level and lack of any anticoagulant therapy were associated with a 17-fold and four-fold increase in PE, respectively, in COVID-19 patients with clinical signs of severity <https://bit.ly/2ETfAfo>

**Cite this article as:** Mouhat B, Besutti M, Bouiller K, *et al.* Elevated D-dimers and lack of anticoagulation predict PE in severe COVID-19 patients. *Eur Respir J* 2020; 56: 2001811 [<https://doi.org/10.1183/13993003.01811-2020>].

This single-page version can be shared freely online.

## ABSTRACT

**Background:** Coronavirus disease 2019 (COVID-19) may predispose to venous thromboembolism. We determined factors independently associated with computed tomography pulmonary angiography (CTPA)-confirmed pulmonary embolism (PE) in hospitalised severe COVID-19 patients.

**Methods:** Among all (n=349) patients hospitalised for COVID-19 in a university hospital in a French region with a high rate of COVID-19, we analysed patients who underwent CTPA for clinical signs of severe disease (oxygen saturation measured by pulse oximetry  $\leq 93\%$  or breathing rate  $\geq 30$  breaths·min<sup>-1</sup>) or rapid clinical worsening. Multivariable analysis was performed using Firth penalised maximum likelihood estimates.

**Results:** 162 (46.4%) patients underwent CTPA (mean±SD age 65.6±13.0 years; 67.3% male (95% CI 59.5–75.5%). PE was diagnosed in 44 (27.2%) patients. Most PEs were segmental and the rate of PE-related right ventricular dysfunction was 15.9%. By multivariable analysis, the only two significant predictors of CTPA-confirmed PE were D-dimer level and the lack of any anticoagulant therapy (OR 4.0 (95% CI 2.4–6.7) per additional quartile and OR 4.5 (95% CI 1.1–7.4), respectively). Receiver operating characteristic curve analysis identified a D-dimer cut-off value of 2590 ng·mL<sup>-1</sup> to best predict occurrence of PE (area under the curve 0.88, p<0.001, sensitivity 83.3%, specificity 83.8%). D-dimer level >2590 ng·mL<sup>-1</sup> was associated with a 17-fold increase in the adjusted risk of PE.

**Conclusion:** Elevated D-dimers (>2590 ng·mL<sup>-1</sup>) and absence of anticoagulant therapy predict PE in

hospitalised COVID-19 patients with clinical signs of severity. These data strengthen the evidence base in favour of systematic anticoagulation, and suggest wider use of D-dimer guided CTPA to screen for PE in acutely ill hospitalised patients with COVID-19.
